# Supplementary material for: Can Coronaviruses Steal Genes from the Host as Evidenced in Western European Hedgehogs by EriCoV Genetic Characterization?
Source: PubMed Central journal article supplement (PMC7765933; doi:10.3390/v12121471), 2020-12-20
Supplement: viruses-12-01471-s001.pdf [file viruses-12-01471-s001.pdf]

## Supplementary Figures and Tables

**Table S1:** Genome localization of Italian EriCoVs predicted protein sequences, length and putative leader TRS

| <b>Sample ID: 116988/1</b> |                               |                    |                 |
|----------------------------|-------------------------------|--------------------|-----------------|
| <b>ORFs</b>                | <b>Location on the genome</b> | <b>Length (aa)</b> | <b>TRS</b>      |
| ORF1ab                     | 221-21784                     | 7188               | 41acgaa45       |
| S                          | 21704-25692                   | 1329               | 21652atgaa21656 |
| CD200 ortholog             |                               |                    |                 |
| ORF3a                      | 25803-26045                   | 81                 | 25698acgaa25702 |
| ORF3b                      | 25827-26240                   | 138                |                 |
| ORF4a                      | 26004-26246                   | 81                 | 25995acgaa25999 |
| ORF4b                      | 26236-26904                   | 223                |                 |
| ORF5                       | 26917-27596                   | 226                | 26907acgaa26911 |
| E                          | 27671-27918                   | 82                 | 27661acgaa27665 |
| M                          | 27934-28589                   | 218                | 27916acgaa27920 |
| N                          | 28645-29921                   | 425                | 28622acgaa28626 |
| ORF8b                      | 28691-29251                   | 187                |                 |

  

| <b>Sample ID: 50265/1</b> |                               |                    |                 |
|---------------------------|-------------------------------|--------------------|-----------------|
| <b>ORFs</b>               | <b>Location on the genome</b> | <b>Length (aa)</b> | <b>TRS</b>      |
| ORF1ab                    | 220-21780                     | 7187               | 40acgaa44       |
| S                         | 21700-25688                   | 1329               | 21649atgaa21653 |
| CD200 ortholog            | 25702-26303                   | 200                | 25694atgaa25698 |
| ORF3a                     | 26307-26619                   | 104                | 26294acgaa26298 |
| ORF3b                     | 26401-26821                   | 140                |                 |
| ORF4a                     | 26578-26822                   | 81                 | 26569acgaa26573 |
| ORF4b                     | 26810-27479                   | 223                |                 |
| ORF5                      | 27491-28170                   | 226                | 27484acgaa27488 |
| E                         | 28245-28492                   | 82                 | 28238acgaa28242 |
| M                         | 28504-29159                   | 218                | 28493acgaa28497 |
| N                         | 29214-30490                   | 425                | 29194acgaa29198 |
| ORF8b                     | 29260-29821                   | 187                |                 |

| <b>Sample ID: 50265/11</b> |                               |                    |                 |
|----------------------------|-------------------------------|--------------------|-----------------|
| <b>ORFs</b>                | <b>Location on the genome</b> | <b>Length (aa)</b> | <b>TRS</b>      |
| ORF1ab                     | 221-21794                     | 7191               | 41acgaa45       |
| S                          | 21710-25713                   | 1334               | 21659acgaa21663 |
| CD200 ortholog             | 25726-26318                   | 197                | 25719aagaa25723 |
| ORF3a                      | 26322-26633                   | 104                | 26309acgaa26313 |
| ORF3b                      | 26416-26836                   | 140                |                 |
| ORF4a                      | 26593-26837                   | 81                 | 26583acgaa26587 |
| ORF4b                      | 26825-27493                   | 223                |                 |
| ORF5                       | 27506-28183                   | 226                | 27498acgaa27502 |
| E                          | 28260-28506                   | 82                 | 28252acgaa28256 |
| M                          | 28523-29175                   | 218                | 28507acgaa28511 |
| N                          | 29233-30506                   | 425                | 29212acgaa29216 |
| ORF8b                      | 29279-29838                   | 186                |                 |

| <b>Sample ID: 50265/12</b> |                               |                    |                 |
|----------------------------|-------------------------------|--------------------|-----------------|
| <b>ORFs</b>                | <b>Location on the genome</b> | <b>Length (aa)</b> | <b>TRS</b>      |
| ORF1ab                     | 229-21788                     | 7187               | 49acgaa53       |
| S                          | 21709-25694                   | 1328               | 21658atgaa21662 |
| CD200 ortholog             | 25707-26116                   | 137                | 25700aagaa25704 |
| ORF3a                      | 26123-26433                   | 104                | 26110acgaa26114 |
| ORF3b                      | 26217-26637                   | 140                |                 |
| ORF4a                      | 26394-26635                   | 80                 | 26385acgaa26389 |
| ORF4b                      | 26626-27298                   | 223                |                 |
| ORF5                       | 27307-27988                   | 226                | 27300acgaa27304 |
| E                          | 28061-28306                   | 82                 | 28054acgaa28058 |
| M                          | 28324-28976                   | 218                | 28309acgaa28313 |
| N                          | 29034-30306                   | 424                | 29014acgaa29018 |
| ORF8b                      | 29080-29639                   | 186                |                 |

| <b>Sample ID: 50265/13</b> |                               |                    |                 |
|----------------------------|-------------------------------|--------------------|-----------------|
| <b>ORFs</b>                | <b>Location on the genome</b> | <b>Length (aa)</b> | <b>TRS</b>      |
| ORF1ab                     | 220-21784                     | 7189               | 40acgaa44       |
| S                          | 21706-25692                   | 1329               | 21655atgaa21659 |
| CD200 ortholog             | 25708-26308                   | 200                | 25700acgaa25704 |
| ORF3a                      | 26313-26624                   | 104                | 26300acgaa26304 |
| ORF3b                      | 26407-26824                   | 140                |                 |
| ORF4a                      | 26584-26827                   | 80                 | 26575acgaa26579 |
| ORF4b                      | 26816-27483                   | 222                |                 |
| ORF5                       | 26497-28178                   | 227                | 27490acgaa27494 |
| E                          | 28251-28494                   | 81                 | 28244acgaa28248 |
| M                          | 28510-29161                   | 217                | 28499acgaa28503 |
| N                          | 29220-30491                   | 424                | 29200acgaa29204 |
| ORF8b                      | 29266-29826                   | 187                |                 |

---

**Sample ID: 50265/15**

---

| <b>ORFs</b>    | <b>Location on the genome</b> | <b>Length (aa)</b> | <b>TRS</b>      |
|----------------|-------------------------------|--------------------|-----------------|
| ORF1ab         | 224-21789                     | 7189               | 44acgaa48       |
| S              | 21707-25667                   | 1320               | 21656acgaa21660 |
| CD200 ortholog |                               |                    |                 |
| ORF3a          | 25773-26082                   | 103                | 25760acgaa25764 |
| ORF3b          | 25867-26284                   | 139                |                 |
| ORF4a          | 26044-26287                   | 80                 | 26035acgaa26039 |
| ORF4b          | 26276-26942                   | 222                |                 |
| ORF5           | 26957-27635                   | 226                | 26950acgaa26954 |
| E              | 27711-27954                   | 81                 | 27703acgaa27707 |
| M              | 27974-28629                   | 218                | 27958acgaa27962 |
| N              | 28684-29959                   | 425                | 28663acgaa28667 |
| ORF8b          | 28730-29330                   | 200                |                 |

---

---

**Sample ID: 50265/17**

---

| <b>ORFs</b>    | <b>Location on the genome</b> | <b>Length (aa)</b> | <b>TRS</b>      |
|----------------|-------------------------------|--------------------|-----------------|
| ORF1ab         | 229-21798                     | 7190               | 49acgaa53       |
| S              | 21715-25708                   | 1331               | 21664atgaa21668 |
| CD200 ortholog | 25724-26354                   | 210                | 25715atgaa25719 |
| ORF3a          | 26369-26682                   | 104                | 26356acgaa26360 |
| ORF3b          | 26463-26882                   | 140                |                 |
| ORF4a          | 26640-26844                   | 68                 | 26631acgaa26635 |
| ORF4b          | 26872-27547                   | 225                |                 |
| ORF5           | 27559-28242                   | 228                | 27552acgaa27556 |
| E              | 28319-28564                   | 82                 | 28312acgaa28316 |
| M              | 28582-29237                   | 218                | 28567acgaa28571 |
| N              | 29292-30567                   | 425                | 29272acgaa29276 |
| ORF8b          | 29338-29900                   | 188                |                 |

---

---

**Sample ID: 50265/19**

---

| <b>ORFs</b>    | <b>Location on the genome</b> | <b>Length (aa)</b> | <b>TRS</b>      |
|----------------|-------------------------------|--------------------|-----------------|
| ORF1ab         | 224-21794                     | 7190               | 44acgaa48       |
| S              | 21710-25703                   | 1331               | 21659atgaa21663 |
| CD200 ortholog | 25718-26314                   | 199                | 25710acgaa25714 |
| ORF3a          | 26330-26642                   | 104                | 26317acgaa26321 |
| ORF3b          | 26424-26844                   | 140                |                 |
| ORF4a          | 26601-26843                   | 81                 | 26592acgaa26596 |
| ORF4b          | 26833-27505                   | 224                |                 |
| ORF5           | 27517-28205                   | 229                | 27511acgaa27515 |
| E              | 28280-28527                   | 82                 | 28274acgaa28278 |
| M              | 28543-29198                   | 218                | 28529acgaa28533 |
| N              | 29253-30528                   | 425                | 29234acgaa29238 |
| ORF8b          | 29299-29861                   | 187                |                 |

---

**Table S2:** Prediction of the putative pp1a/pp1b cleavage sites of Italian EriCoVs based on sequence comparison with Erinaceus/VMC/DEU/2012 (NC\_039207.1)

| NS P | Protein size (aa) | 116988/1         | 50265/1          | 50265/11         | 50265/12         | 50265/13         | 50265/15         | 50265/17         | 50265/19         | Putative functional domain(s) <sup>a</sup> |
|------|-------------------|------------------|------------------|------------------|------------------|------------------|------------------|------------------|------------------|--------------------------------------------|
| 1    | 200               | Met1 – Gly200    | Met1 – Gly200    | Met1 – Gly200    | Met1 – Gly200    | Met1 – Gly200    | Met1 – Gly200    | Met1 – Gly200    | Met1 – Gly200    |                                            |
| 2    | 659               | Gly201- Gly859   | Asp201- Gly859   | Asp201- Gly859   | Asp201- Gly859   | Asp201- Gly859   | Ala201- Gly858   | Asp201- Gly859   | Asp201- Gly859   |                                            |
| 3    | 1983/1986         | Ala860- Gly2843  | Ala860- Gly2839  | Ala860- Gly2844  | Ala860- Gly2839  | Ala860- Gly2839  | Ala859- Gly2840  | Ala860- Gly2843  | Ala860- Gly2843  | ADRP, PL2pro                               |
| 4    | 504/506           | Ser2844- Gln3310 | Ser2840- Gln3303 | Ser2845- Gln3310 | Ser2840- Gln3303 | Ser2840- Gln3310 | Ser2841- Gln3304 | Ser2844- Gln3307 | Ser2844- Gln3310 |                                            |
| 5    | 303/305           | Ser3311- Gln3654 | Ser3304- Gln3650 | Ser3311- Gln3655 | Ser3304- Gln3650 | Ser3311- Gln3650 | Ser3305- Gln3650 | Ser3308- Gln3654 | Ser3311- Gln3654 | 3CLpro                                     |
| 6    | 291               | Ser3655- Gln3946 | Ser3651- Gln3942 | Ser3656- Gln3946 | Ser3655- Gln3942 | Ser3651- Gln3942 | Ser3651- Gln3942 | Ser3655- Gln3946 | Ser3655- Gln3946 |                                            |
| 7    | 82                | Ser3938- Gln4029 | Ser3934- Gln4025 | Ser3938- Gln4029 | Ser3934- Gln4025 | Ser3934- Gln4025 | Ser3934- Gln4025 | Ser3938- Gln4029 | Ser3938- Gln4029 |                                            |
| 8    | 198               | Ser4030- Gln4228 | Ser4026- Gln4224 | Ser4030- Gln4228 | Ser4026- Gln4224 | Ser4026- Gln4224 | Ser4036- Gln4224 | Ser4030- Gln4228 | Ser4030- Gln4228 | Primase                                    |
| 9    | 109               | Asn4229- Gln4338 | Asn4225- Gln4334 | Asn4229- Gln4338 | Asn4225- Gln4334 | Asn4225- Gln4336 | Asn4225- Gln4334 | Asn4229- Gln4338 | Asn4229- Gln4338 |                                            |
| 10   | 139               | Ala4339- His4478 | Ala4335- His4474 | Ala4339- His4478 | Ala4335- His4474 | Ala4337- His4476 | Ala4335- His4474 | Ala4339- His4478 | Ala4339- His4478 |                                            |
| 11   | 13                | Ser4479- Leu4492 | Ser4475- Leu4488 | Ser4479- Leu4492 | Ser4475- Leu4488 | Ser4477- Leu4490 | Ser4475- Leu4488 | Ser4479- Leu4492 | Ser4479- Leu4492 | Short peptide at the end of ORF1a          |
| 12   | 933               | Ser4493- Gln5412 | Ser4489- Gln5408 | Ser4493- Gln5412 | Ser4489- Gln5408 | Ser4491- Gln5410 | Ser4489- Gln5408 | Ser4493- Gln5412 | Ser4493- Gln5412 | RdRp                                       |
| 13   | 597               | Ala5413- Gln6010 | Ala5409- Gln6006 | Ala5413- Gln6010 | Ala5409- Gln6006 | Ala5411- Gln6008 | Ala5409- Gln6006 | Ala5413- Gln6010 | Ala5413- Gln6010 | Hel, NTPase                                |
| 14   | 523               | Ser6011- Gln6534 | Ser6007- Gln6530 | Ser6011- Gln6534 | Ser6007- Gln6530 | Ser6009- Gln6532 | Ser6007- Gln6530 | Ser6011- Gln6534 | Ser6011- Gln6534 | ExoN, NMT                                  |
| 15   | 342               | Gly6535- Gln6877 | Gly6531- Gln6873 | Gly6535- Gln6877 | Gly6531- Gln6873 | Gly6533- Gln6875 | Gly6531- Gln6873 | Gly6535- Gln6877 | Gly6535- Gln6877 | NendoU                                     |
| 16   | 310/311           | Ala6878- Cys7188 | Ala6874- Cys7183 | Ala6878- Cys7189 | Ala6874- Cys7183 | Ala6876- Cys7185 | Ala6874- Cys7185 | Ala6878- Cys7189 | Ala6878- Cys7189 | OMT                                        |

<sup>a</sup>ADRP, ADP-ribose 1"-phosphatase; PL2pro, papain-like protease 2; 3CLpro, coronavirus nsp5 protease; Hel, helicase; NTPase, nucleoside triphosphatase; ExoN, exoribonuclease; NMT, N7 methyltransferase; NendoU, endoribonuclease; OMT, 2= *O*-methyltransferase.

**Table S3:** Amino acids identities (%) between predicted proteins of the Italian EriCoVs and prototype clade c Betacoronaviruses.

| CoV strains <sup>a</sup> |             | 116988/1 | 50265/1 | 50265/11 | 50265/12 | 50265/13 | 50265/15 | 50265/17 | 50265/19 |
|--------------------------|-------------|----------|---------|----------|----------|----------|----------|----------|----------|
|                          | <b>ORFs</b> |          |         |          |          |          |          |          |          |
| EriCoV                   | ORF1ab      | 95       | 94      | 94       | 94       | 94       | 94       | 94       | 95       |
|                          | S           | 92       | 92      | 92       | 92       | 92       | 91       | 92       | 92       |
|                          | ORF3a       | 84       | 91      | 90       | 87       | 91       | 90       | 89       | 90       |
|                          | ORF3b       | 84       | 85      | 82       | 85       | 85       | 81       | 81       | 79       |
|                          | ORF4a       | 84       | 83      | 83       | 86       | 86       | 83       | 82       | 79       |
|                          | ORF4b       | 92       | 90      | 91       | 90       | 90       | 91       | 82       | 84       |
|                          | ORF5        | 89       | 90      | 91       | 90       | 90       | 91       | 91       | 93       |
|                          | E           | 96       | 96      | 96       | 96       | 96       | 95       | 96       | 96       |
|                          | M           | 94       | 94      | 95       | 95       | 94       | 95       | 94       | 96       |
|                          | N           | 94       | 94      | 96       | 95       | 94       | 94       | 94       | 94       |
|                          | ORF8b       | 78       | 78      | 77       | 77       | 78       | 79       | 76       | 77       |
| MERS-CoV                 | ORF1ab      | 75       | 75      | 75       | 75       | 75       | 75       | 75       | 75       |
|                          | S           | 57       | 58      | 58       | 59       | 58       | 59       | 58       | 58       |
|                          | ORF3a       | 34       | 33      | 32       | 31       | 33       | 32       | 33       | 31       |
|                          | ORF3b       | 35       | 37      | 36       | 37       | 37       | 34       | 36       | 36       |
|                          | ORF4a       | 37       | 40      | 39       | 40       | 40       | 38       | 39       | 40       |
|                          | ORF4b       | 40       | 43      | 40       | 43       | 43       | 41       | 39       | 42       |
|                          | ORF5        | 46       | 50      | 51       | 50       | 50       | 51       | 52       | 51       |
|                          | E           | 74       | 74      | 74       | 74       | 74       | 73       | 74       | 74       |
|                          | M           | 80       | 78      | 79       | 79       | 78       | 79       | 78       | 79       |
|                          | N           | 74       | 72      | 72       | 72       | 72       | 72       | 73       | 72       |
|                          | ORF8b       | 45       | 46      | 48       | 48       | 46       | 48       | 47       | 46       |
| HKU31                    | ORF1ab      | 84       | 84      | 84       | 84       | 84       | 84       | 84       | 84       |
|                          | S           | 80       | 80      | 81       | 80       | 80       | 81       | 80       | 81       |
|                          | ORF3a       | 59       | 58      | 60       | 59       | 58       | 60       | 61       | 57       |
|                          | ORF3b       | 69       | 71      | 67       | 71       | 71       | 67       | 71       | 67       |
|                          | ORF4a       | 68       | 68      | 65       | 68       | 68       | 65       | 69       | 64       |
|                          | ORF4b       | 73       | 73      | 72       | 73       | 73       | 73       | 72       | 74       |
|                          | ORF5        | 75       | 76      | 77       | 76       | 76       | 76       | 77       | 77       |
|                          | E           | 87       | 87      | 87       | 87       | 87       | 85       | 87       | 87       |
|                          | M           | 94       | 94      | 94       | 94       | 94       | 93       | 94       | 92       |
|                          | N           | 84       | 84      | 84       | 84       | 84       | 84       | 84       | 84       |
|                          | ORF8b       | 59       | 58      | 60       | 59       | 58       | 58       | 59       | 61       |
| HKU4                     | ORF1ab      | 72       | 70      | 70       | 70       | 70       | 70       | 70       | 70       |
|                          | S           | 57       | 60      | 59       | 60       | 60       | 60       | 59       | 59       |
|                          | ORF3a       | 33       | 25      | 26       | 25       | 25       | 26       | 26       | 23       |
|                          | ORF3b       | 41       | 39      | 37       | 39       | 39       | 35       | 37       | 39       |
|                          | ORF4a       | 37       | 44      | 43       | 44       | 44       | 40       | 43       | 43       |
|                          | ORF4b       | 30       | 28      | 28       | 30       | 30       | 29       | 26       | 27       |
|                          | ORF5        | 38       | 40      | 40       | 40       | 40       | 41       | 40       | 40       |
|                          | E           | 61       | 62      | 62       | 62       | 62       | 61       | 62       | 62       |
|                          | M           | 79       | 79      | 79       | 78       | 79       | 79       | 79       | 78       |
|                          | N           | 70       | 70      | 71       | 70       | 70       | 70       | 70       | 71       |
|                          | ORF8b       | 41       | 41      | 42       | 42       | 41       | 41       | 43       | 41       |
| HKU5                     | ORF1ab      | 73       | 72      | 72       | 72       | 72       | 72       | 72       | 72       |
|                          | S           | 58       | 59      | 59       | 59       | 59       | 59       | 58       | 59       |
|                          | ORF3a       | 30       | 26      | 25       | 25       | 26       | 25       | 25       | 25       |
|                          | ORF3b       | 47       | 39      | 37       | 39       | 39       | 36       | 36       | 37       |
|                          | ORF4a       | 40       | 48      | 47       | 48       | 48       | 45       | 45       | 45       |
|                          | ORF4b       | 28       | 28      | 27       | 28       | 28       | 28       | 26       | 28       |
|                          | ORF5        | 45       | 48      | 48       | 48       | 48       | 48       | 47       | 47       |
|                          | E           | 62       | 61      | 61       | 61       | 61       | 60       | 61       | 61       |

|       |    |    |    |    |    |    |    |    |
|-------|----|----|----|----|----|----|----|----|
| M     | 81 | 80 | 81 | 80 | 80 | 19 | 81 | 78 |
| N     | 69 | 69 | 69 | 69 | 69 | 69 | 69 | 70 |
| ORF8b | 47 | 50 | 50 | 50 | 50 | 47 | 50 | 50 |

<sup>a</sup>Accession number of reference strains:

- EriCoV: NC\_039207.1, Erinaceus/VMC/DEU/2012
- MERS-CoV: NC\_019843, HCoV-EMC/2012
- HKU31: MK907286.1, HKU31 strain F6
- HKU4: EF065505.1, HKU4-1
- HKU5: EF065509.1, HKU5-1

**Table S4:** Amino acids identities (%) between predicted CD200 ortholog from Italian EriCoVs and human, mouse and hedgehog CD200.

| CD200 host <sup>a</sup> | Homo sapiens | Mus Musculus | Erinaceus europaeus | 50265/1 | 50265/4 | 50265/10 | 50265/11 | 50265/12 | 50265/17 | 50265/19 |
|-------------------------|--------------|--------------|---------------------|---------|---------|----------|----------|----------|----------|----------|
| Mus Musculus            | 76.6         |              |                     |         |         |          |          |          |          |          |
| Erinaceus europaeus     | 72.1         | 67.3         |                     |         |         |          |          |          |          |          |
| 50265/1                 | 61.6         | 54.8         | 78.2                |         |         |          |          |          |          |          |
| 50265/4                 | 53.8         | 47.8         | 63.2                | 67.9    |         |          |          |          |          |          |
| 50265/10                | 64.1         | 58.1         | 79.8                | 85.5    | 66.6    |          |          |          |          |          |
| 50265/11                | 63.8         | 55.2         | 81.0                | 83.3    | 80.9    | 85.5     |          |          |          |          |
| 50265/12                | 61.2         | 55.7         | 78.6                | 85.3    | 66.4    | 83.2     | 90.4     |          |          |          |
| 50265/14                | 61.1         | 54.3         | 76.8                | 100     | 67.4    | 84.0     | 82.5     | 85.7     |          |          |
| 50265/17                | 59.3         | 54.6         | 75.0                | 80.0    | 67.5    | 82.1     | 81.1     | 76.1     | 79.4     |          |
| 50265/19                | 61.7         | 53.7         | 72.6                | 71.4    | 67.5    | 80.1     | 82.5     | 71.6     | 71.9     | 71.3     |

<sup>a</sup>Accession number:

- Homo sapiens: NP\_005935, OX-2 membrane glycoprotein isoform
- Mus musculus: 4BFI, complex of the extracellular portions of mouse CD200R and mouse CD200
- Erinaceus\_europaeus: XP\_007516410, OX-2 membrane glycoprotein isoform X1

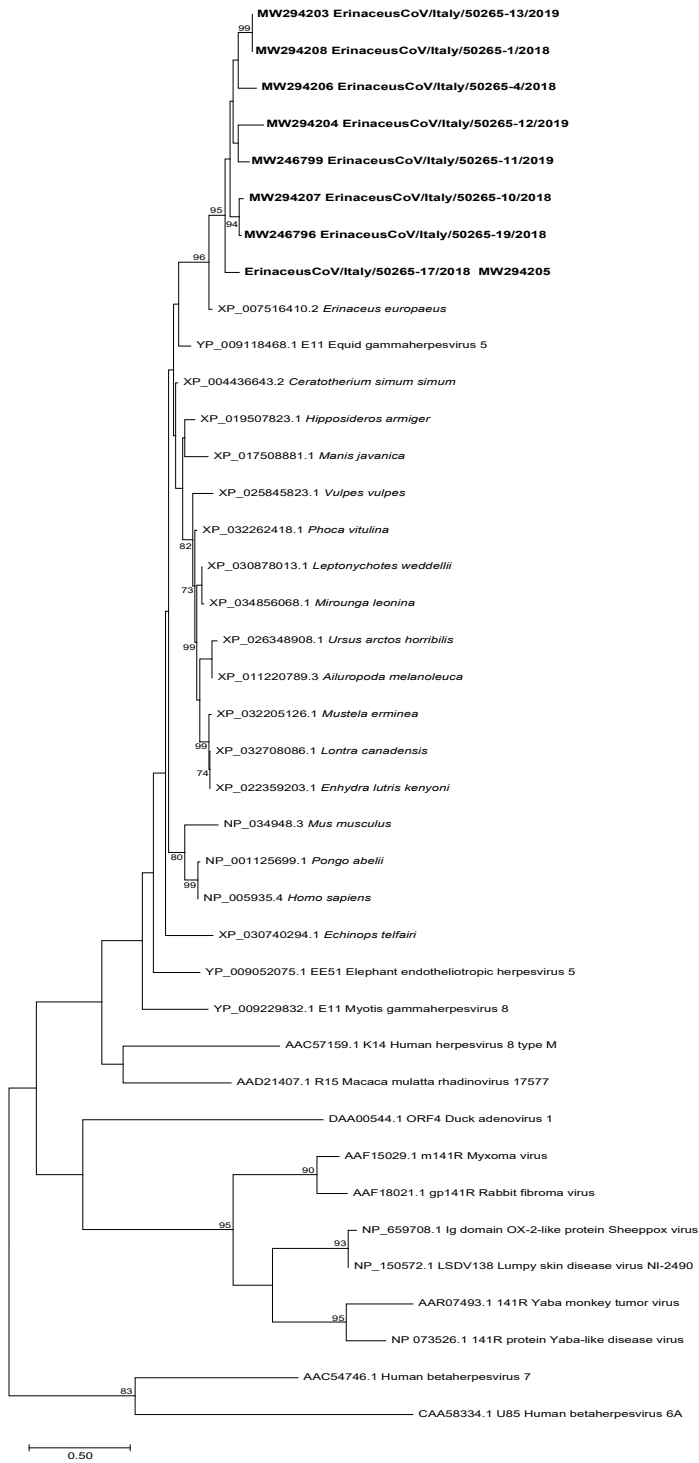

**Figure S1:** Maximum Likelihood phylogenetic tree of CD200 protein sequences reported in mammals and viral orthologs. The tree was built using the JTT+G model, as suggested by MEGA10 model test and 1000 bootstrap replicates with supported nodes (>70%). Sixteen CD200 sequences were included from mammals, 15 CD200 orthologs from viruses and the 8 CD200 reported in Italian EriCoVs from this study, reported in bold. The sequences are reported including the Accession number, mammal species or viral strain name.





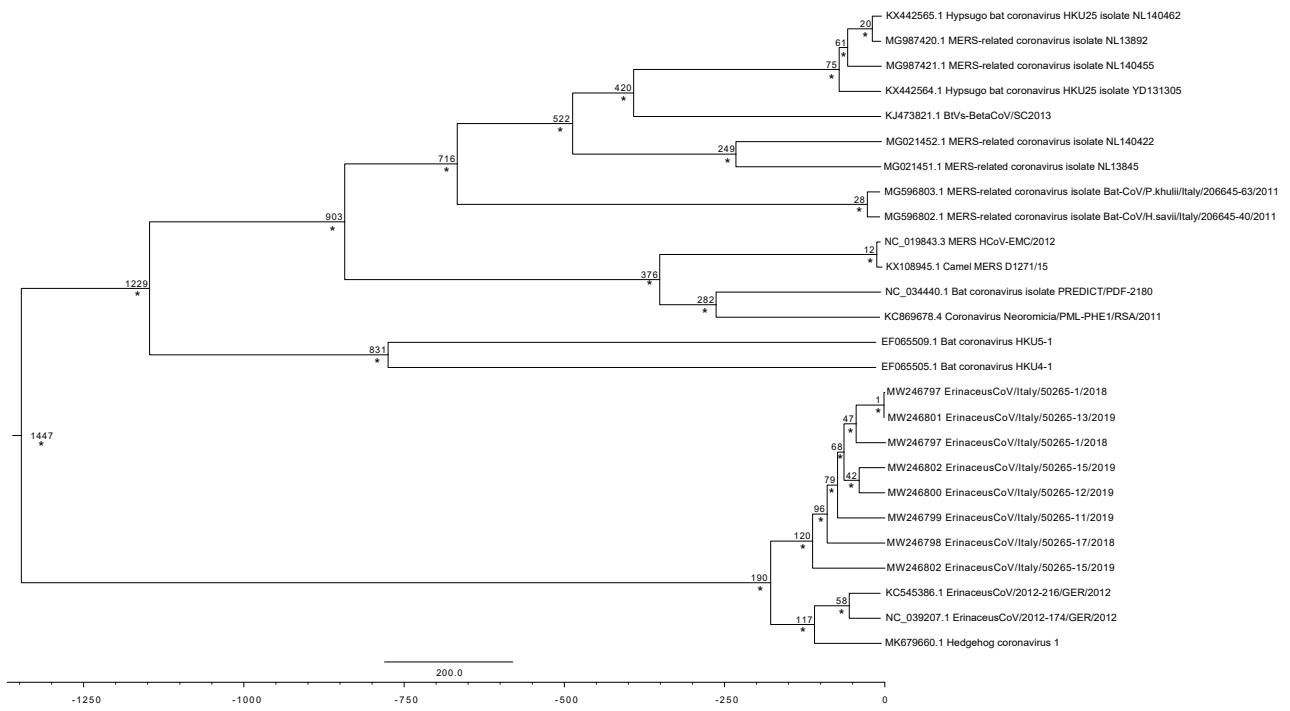

**Figure S3:** Estimation of tMRCA of members of *Merbecovirus* using the complete genome sequences including the Italian EriCoVs. The mean estimated dates were reported at the nodes. The asterisks indicate a posterior probability >0.9. The sequences are reported as Accession numbers, strain name and sampling dates.
